# Supplementary material
Source: PubMed Central journal article supplement (PMC4079361)
Supplement: supp_tpc.114.123950_tpc123590_Supplemental2.pdf [file supp_tpc.114.123950_tpc123590_Supplemental2.pdf]

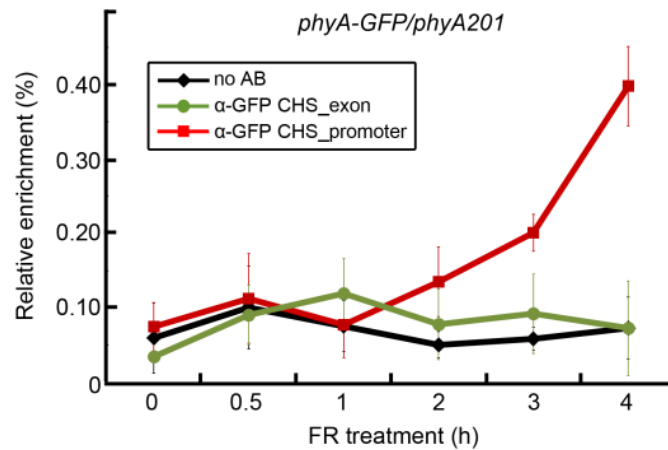

**Supplemental Figure 1.** Time Course of phyA Association with Its Known Direct Target Gene *CHS* by ChIP-qPCR.

Four-day-old etiolated *phyA-GFP/phyA201* seedlings were irradiated with FR as indicated, followed by ChIP-qPCR using anti-GFP antibody or without antibody (no AB). ChIP-DNA was amplified on *CHS* promoter region and exon region (as negative control). Primer information is as reported in Chen et al., 2012.

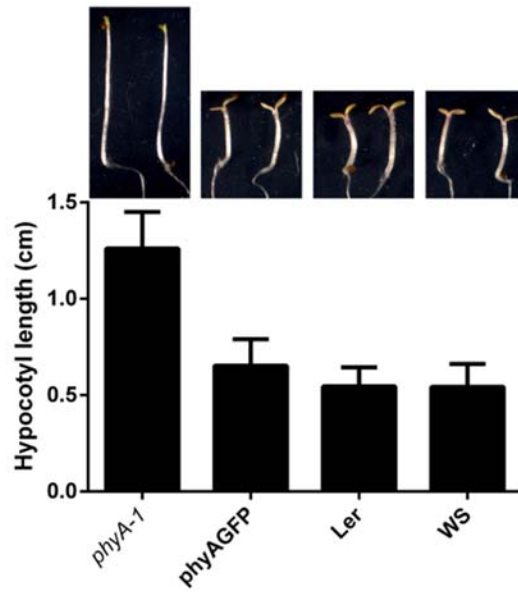

**Supplemental Figure 2.** Phenotype of 5-day-old FR-grown *phyA*-GFP Line, *phyA-1* Null Mutant and WT Seedlings (of Ler and WS ecotype). Error bars represent SD of three biological experiments (n>20 for each biological repeat).

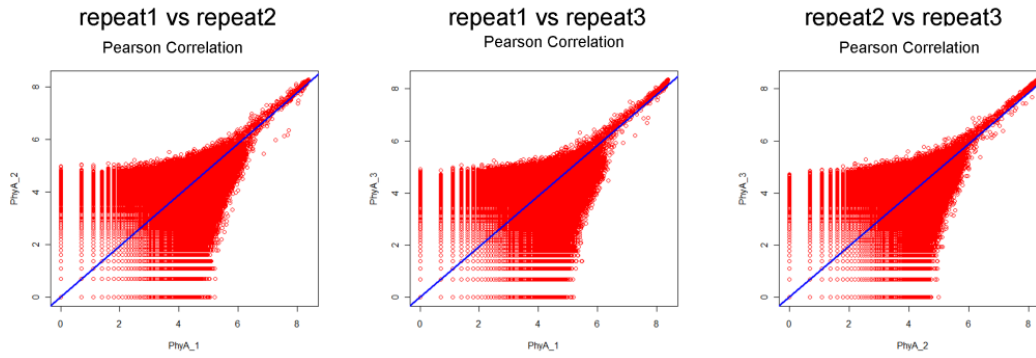

**Supplemental Figure 3.** Scatter Plot of Pearson Correlation of Three phyA ChIP-seq Replicates.

The coefficients between replicate 1 and 2, 1 and 3, and 2 and 3 are 0.9747149, 0.9724806, and 0.980623, respectively.

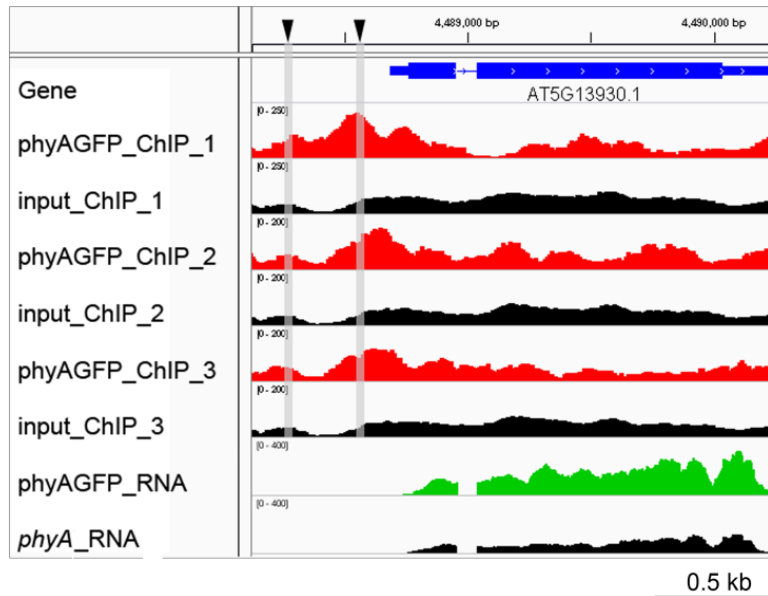

**Supplemental Figure 4.** phyA ChIP-seq and RNA-seq Peaks on Its Known Direct Target Gene *CHS*.

phyA ChIP-seq peaks (in red) of all three biological replicates are mainly located on *CHS* promoter region. The input controls are shown in black. Representative RNA-seq peaks are indicated in green. Schematic diagram of the *CHS* gene structure is shown at the top. Triangles represent the positions of the two G-boxes on the *CHS* promoter, which are experimentally-proved binding sites of phyA and FHY1 (Chen et al., 2012). The grey bars indicate the positions of the two G-boxes in phyA ChIP-seq peaks.

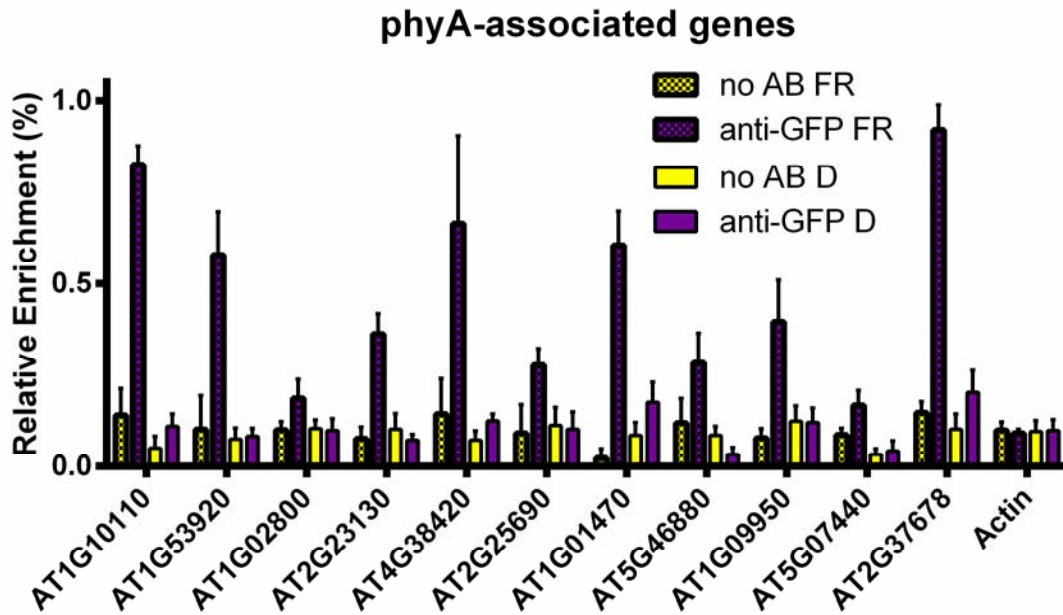

**Supplemental Figure 5.** Validation of Several phyA-associated Genes by ChIP-qPCR Analysis. Four-day-old etiolated phyA-GFP transgenic lines were treated without (D) or with 3 h FR (FR), followed by ChIP-qPCR analysis using anti-GFP antibody. Data were normalized with corresponding input samples. Error bars represent SD of three biological experiments.

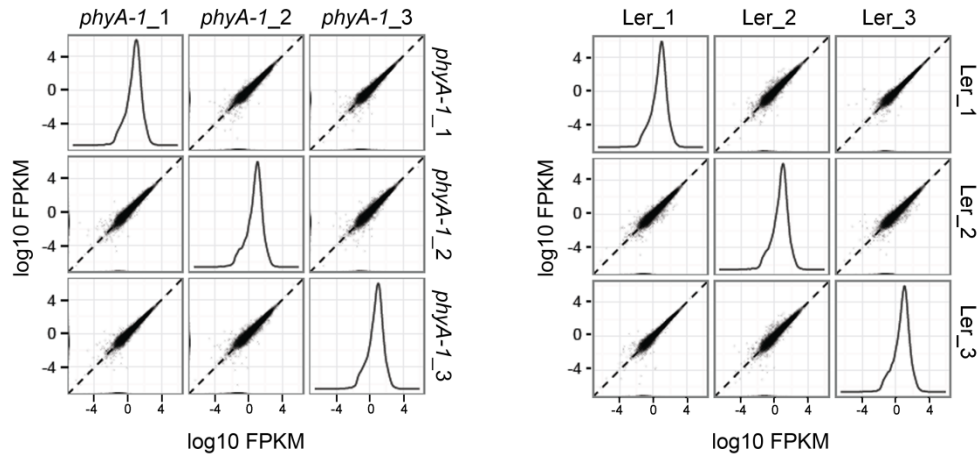

**Supplemental Figure 6.** Scatter Plot of Pearson Correlation of Three RNA-seq Replicates for wild-type (Ler) and *phyA* Mutant.

The coefficients between replicate 1 and 2, 2 and 3, and 1 and 3 are 0.9997498, 0.9961875, and 0.9942736, respectively, for *phyA-1* and 0.9985142, 0.9972821, 0.9994166, respectively, for Ler. The peaks represent distribution of normalized gene expression value in each sample.

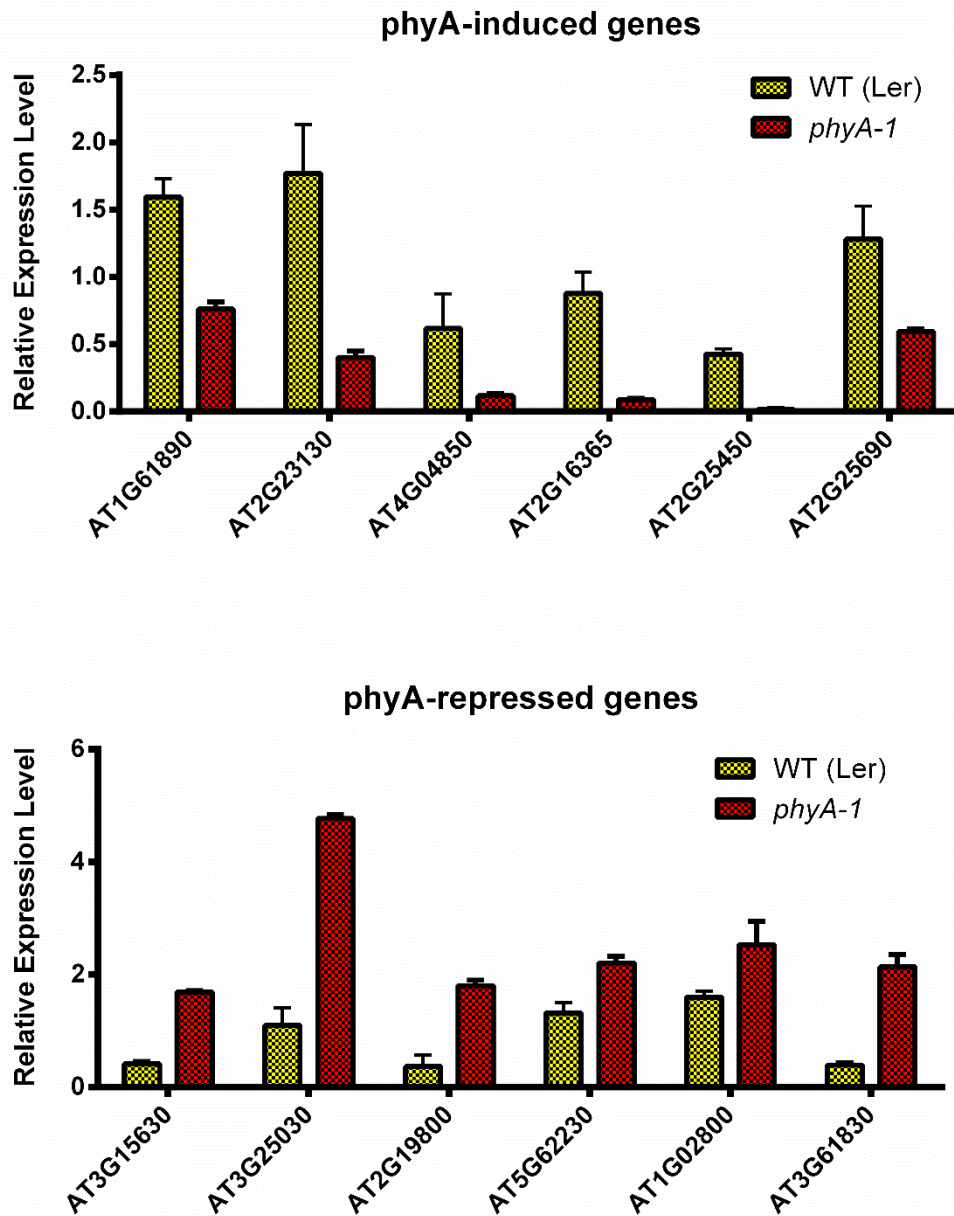

**Supplemental Figure 7.** Validation of Several *phyA*-induced Genes (top) and *phyA*-Repressed Genes (bottom) by RT-qPCR Analysis. WT (of Ler ecotype) and *phyA-1* mutant lines were treated as same as the samples used for RNA-seq, followed by RT-qPCR analysis. *Gene/Actin* is expressed as relative expression level. Error bars represent SD of three biological experiments.

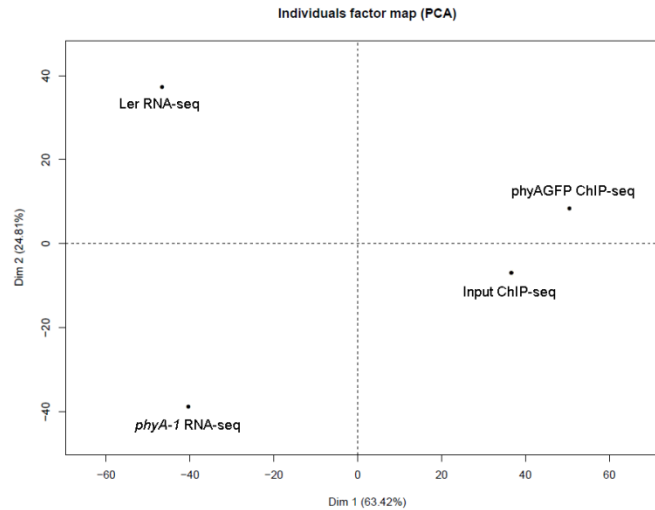

**Supplemental Figure 8.** Principal Components Analysis of 448 *phyA* Direct Target Genes. *phyA* ChIP-seq and RNA-seq data are distinguishable by the first dimension (Dim 1, 63.42% of the total variation). On the other hand, mRNA-seq data from Ler is closest to the ChIP-seq data from the *phyA*-GFP line on the second dimension (Dim 2, 24.81% of the total variation). The PCA analysis was performed in R using the “prcomp” command. The quantity of *phyA* binding signals and gene expression levels were calculated using FPKM values (Fragments Per Kilobase of exon <sup>1</sup> or promoter/5' UTR per Million).



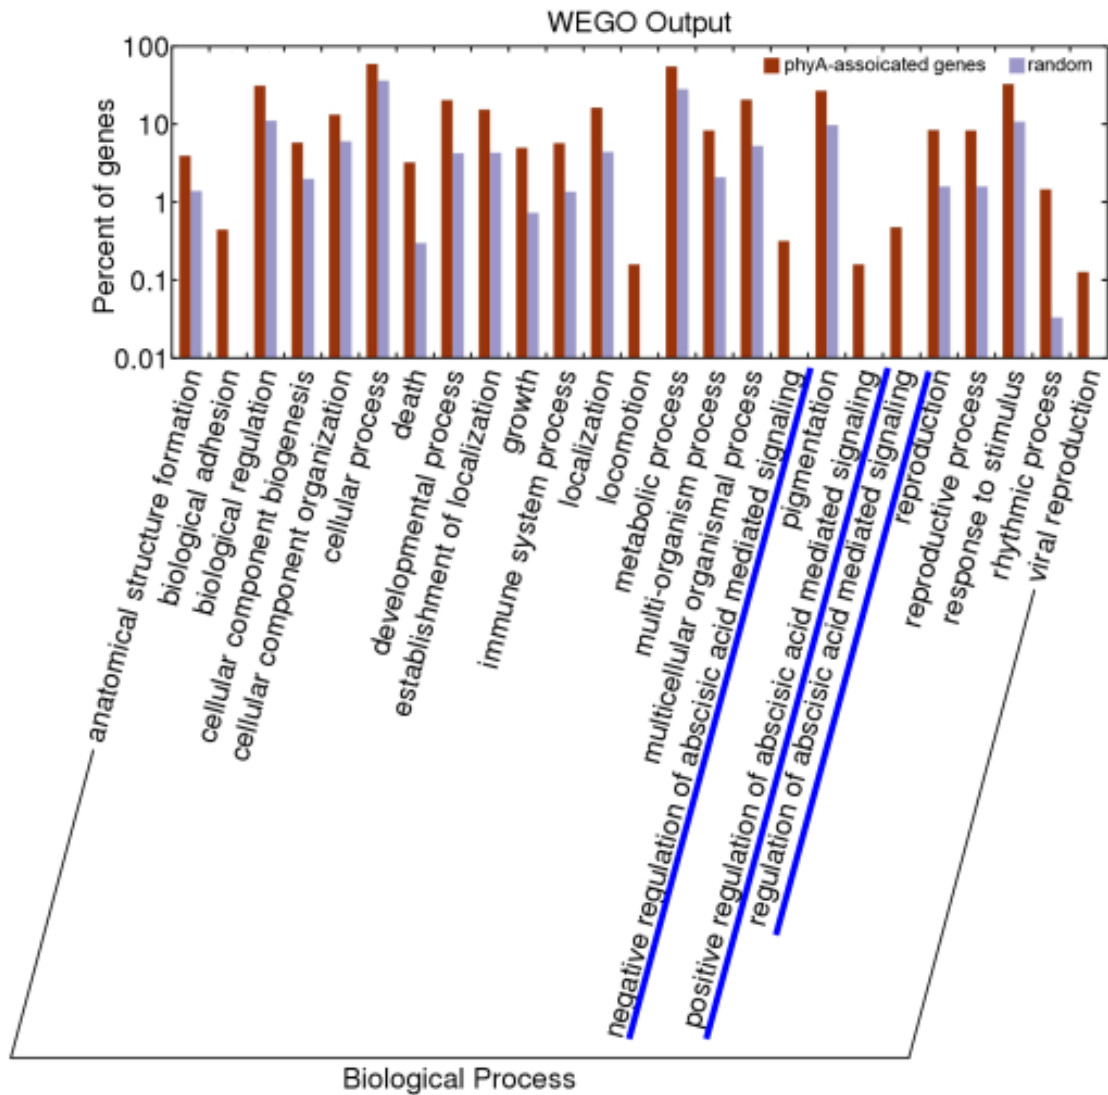

**Supplemental Figure 9.** WEGO Analysis of phyA-associated Genes Compared with Random. The occurrence of ABA-related genes in phyA-associated genes is much higher than random genes. More detailed information (Biological function, level 4) were provided for ABA-related genes, while brief information (Biological function, level 2) were provided for other groups to make the figure more compact.

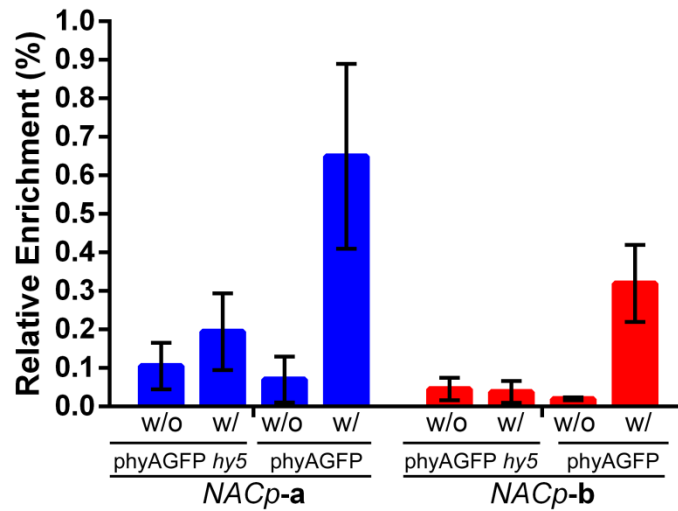

**Supplemental Figure 10.** PhyA Fails to Associate with Two G-box Containing Regions on *NAC019* Promoter in Absence of HY5.

The homozygous crossed line *phyA-GFP/phyA201 hy5-ks50* were grown in dark for four days and exposed to FR for 3 hours. Then the materials were collected for anti-GFP ChIP-PCR. w/o, without antibody; w/, with antibody. Error bars represent SD of triplicate experiments.

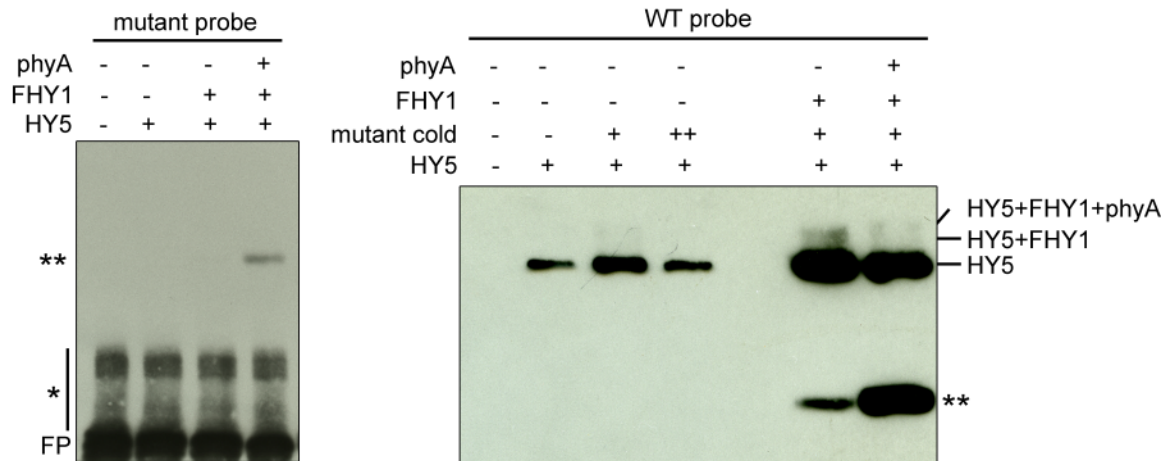

**Supplemental Figure 11.** Super-shifted EMSA Assay Shows That the HY5 Binding Site G-box Is Critical to the Recruitment of the phyA-FHY1-HY5 Complex. The G-box which is positioned at -159 on *NAC019* promoter was mutated to AAAAAA. Left, neither HY5 nor FHY1-phyA complex binds to the mutant probe. Right, the HY5-DNA band is still super-shifted in presence of mutant cold sequence. The bands are separated on gels for longer time compared to that on the left panel to distinguish supershifted bands. The EMSA reactions contained indicated proteins and labeled probes, without (-) or with 200-folds (+), or 1000-folds (++) cold sequence (unlabelled probes). \* represents non-specific bands, \*\* represents an unknown band. FP, free probe.

**Supplemental Table 1.** The Correspondence between phyA Peaks and phyA-associated Genes.

| Total phyA peaks | intergenic | One peak assigned to multiple genes | Multiple peaks reside in one gene | One peak resides in one gene |
|------------------|------------|-------------------------------------|-----------------------------------|------------------------------|
| 3798             | 811        | 944                                 | 997                               | 1183                         |

**Supplemental Table 2.** List of Motifs Enriched in Promoters of phyA-associated or phyA-regulated Genes.

| <b>Motifs enriched in phyA-associated genes</b> |                  |
|-------------------------------------------------|------------------|
| <b>name</b>                                     | <b>sequence</b>  |
| ABADES11                                        | RTACGTGGCR       |
| ABRE2HVA22                                      | CGCACGTGTC       |
| ABRE3HVA1                                       | GCAACGTGTC       |
| ABREA2HVA1                                      | CCTACGTGGC       |
| ABREATCONSENSUS                                 | YACGTGGC         |
| ABREATRD22                                      | RYACGTGGYR       |
| ABREAZMRAB28                                    | GCCACGTGGG       |
| ABREBNNAPA                                      | CGCCACGTGTCC     |
| ABREBZMRAB28                                    | TCCACGTCTC       |
| ABRECE1HVA22                                    | TGCCACCGG        |
| ABREMOTIFAOSOSEM                                | TACGTGTC         |
| ABREOSRAB21                                     | ACGTSSSC         |
| ABRETAEM                                        | GGACACGTGGC      |
| ABREZMRAB28                                     | CCACGTGG         |
| ACEATCHS                                        | GACACGTAGA       |
| ACGTABREMOTIFA2OSEM                             | ACGTGKC          |
| ACGTROOT1                                       | GCCACGTGGC       |
| AGL1ATCONSENSUS                                 | NTDCCWWWNNGGWAAN |
| AUXRETGA2GMGH3                                  | TGACGTGGC        |
| B2GMAUX28                                       | CTTGTCGTCA       |
| BOXIIPCCHS                                      | ACGTGGC          |
| CACGTGMOTIF                                     | CACGTG           |
| CE3OSOSEM                                       | AACGCGTGTC       |
| CPRFPCCHS                                       | CCACGTGGCC       |
| CPRFPCCHS                                       | CCACGTGGCC       |
| CTRMCAV35S                                      | TCTCTCTCT        |
| DR5GMGH3                                        | CCTTTTGTCTC      |
| EMBP1TAEM                                       | CACGTGGC         |
| EREGCC                                          | TAAGAGCCGCC      |
| GADOWNAT                                        | ACGTGTC          |
| GARE2                                           | RTAACARANTCYGG   |
| GBOXLERBCS                                      | MCACGTGGC        |
| GBOXPC                                          | ACCACGTGGC       |
| GBOXRELOSAMY3                                   | CTACGTGGCCA      |
| GCBP2ZMGAPC4                                    | GTGGGCCCG        |
| HEXAT                                           | TGACGTGG         |
| HY5AT                                           | TGACACGTGGCA     |
| LREBOXIIPCCHS1                                  | TCCACGTGGC       |

|                                              |                     |
|----------------------------------------------|---------------------|
| LRENPCABE                                    | ACGTGGCA            |
| MREATCHS                                     | TCTAACCTACCA        |
| MSACRCYM                                     | AGACCGTTG           |
| NONAMERATH4                                  | AGATCGACG           |
| O2F1BE2S1                                    | TCCACGTCGA          |
| OPAQUE2ZMB32                                 | GATGAYRTGG          |
| PALBOXPPC                                    | YTYMMCMAMCMMC       |
| PALINDROMICCBOXGM                            | TGACGTCA            |
| PE2FNTRNR1A                                  | ATTCGCGC            |
| SGBFGMGMAUX28                                | TCCACGTGTC          |
| SITEIIATCYTC                                 | TGGGCY              |
| SITEIIBOSPCNA                                | TGGTCCCAC           |
| SORLIP2AT                                    | GGGCC               |
| UP1ATMSD                                     | GGCCCAWWW           |
| UPRE2AT                                      | CCACGTCATC          |
| UPRMOTIFIAT                                  | CCACGTCA            |
| UPRMOTIFIAT                                  | CCNNNNNNNNNNNNCCACG |
| VOZATVPP                                     | GCGTNNNNNNNACGC     |
| <b>Motifs enriched in phyA-induced genes</b> |                     |
| <b>name</b>                                  | <b>sequence</b>     |
| ABADES11                                     | RTACGTGGCR          |
| ABRE2HVA22                                   | CGCACGTGTC          |
| ABRE3HVA1                                    | GCAACGTGTC          |
| ABREA2HVA1                                   | CCTACGTGGC          |
| ABREATCONSENSUS                              | YACGTGGC            |
| ABREATRD22                                   | RYACGTGGYR          |
| ABREBNNAPA                                   | CGCCACGTGTCC        |
| ABRETAEM                                     | GGACACGTGGC         |
| ABREZMRAB28                                  | CCACGTGG            |
| ACGTABREMOTIFA2OSEM                          | ACGTGKC             |
| ACGTROOT1                                    | GCCACGTGGC          |
| AUXRETGA2GMGH3                               | TGACGTGGC           |
| BOXIIPCCHS                                   | ACGTGGC             |
| CPRFPCCHS                                    | CCACGTGGCC          |
| CPRFPCCHS                                    | CCACGTGGCC          |
| DR5GMGH3                                     | CCTTTTGTCTC         |
| EMBP1TAEM                                    | CACGTGGC            |
| EREGCC                                       | TAAGAGCCGCC         |
| GARE2                                        | RTAACARANTCYGG      |
| GBOXLERBCS                                   | MCACGTGGC           |
| GBOXRELOSAMY3                                | CTACGTGGCCA         |
| HEXAT                                        | TGACGTGG            |

|                                                |                                   |
|------------------------------------------------|-----------------------------------|
| HY5AT                                          | TGACACGTGGCA                      |
| LREBOXIIPCCHS1                                 | TCCACGTGGC                        |
| LRENPCABE                                      | ACGTGGCA                          |
| MREATCHS                                       | TCTAACCTACCA                      |
| PE2FNTRNR1A                                    | ATTGCGCG                          |
| SGBFGMGMAUX28                                  | TCCACGTGTC                        |
| SITEIIBOSPCNA                                  | TGGTCCCAC                         |
| UPRE2AT                                        | CCACGTCATC                        |
| UPRMOTIFIAT                                    | CCACGTCA                          |
| ABRE3HVA22                                     | GCCACGTACA                        |
| ABRECE3ZMRAB28                                 | ACGCGCCTCCTC                      |
| ABREDISTBBNAPA                                 | GCCACTTGTC                        |
| ABREMOTIFIIOSRAB16B                            | GCCGCGTGGC                        |
| ACGTSEED3                                      | GTACGTGGCG                        |
| ACIPVPAL2                                      | CCCACCTACC                        |
| AMMORESVDCRNIA1                                | GGCCCCGGG                         |
| AS1LIKECSHPRA                                  | AAATGACGAAAATGC                   |
| C1MOTIFZMBZ2                                   | TAACTSAAGTTA                      |
| CGF1ATCAB2                                     | GATAAAGATTACTTCAGATATAACAAACGTTAC |
| CONSERVED11NTZMATP1                            | ACGTATTAATAA                      |
| D2GMAUX28                                      | ATTTATATAAAT                      |
| ELRE2PCPAL1                                    | ATTCTCACCTACCA                    |
| GBOX10NT                                       | GCCACGTGCC                        |
| GBOXSORBCS1                                    | TCCACGTGGT                        |
| GCAACREPEATZMZEIN                              | GCAACGCAAC                        |
| GLUTECOREOS                                    | CTTTCGTGTAC                       |
| GRAZMRAB28                                     | CATGCCGCC                         |
| HDZIPIIIAT                                     | GTAATSATTAC                       |
| HSELIKENTGLN2                                  | AGGAATTCCT                        |
| MEJARELELOX                                    | GATACANNAATNTGATG                 |
| OBP1ATGST6                                     | TACACTTTTGG                       |
| PIIATGAPB                                      | TTGGTTTTGATCAAAACCAA              |
| POLLEN2LELAT52                                 | TCCACCATA                         |
| PR2GCNT                                        | TAARAGCCGCC                       |
| RSEPVGRP1                                      | CAACTTTCATAT                      |
| S2FSORPL21                                     | CCATACATT                         |
| SORLIP3AT                                      | CTCAAGTGA                         |
| UPRE1AT                                        | ATTGGTCCACG                       |
| <b>Motifs enriched in phyA-repressed genes</b> |                                   |
| <b>name</b>                                    | <b>sequence</b>                   |
| ABADES11                                       | RTACGTGGCR                        |
| ABREA2HVA1                                     | CCTACGTGGC                        |

---

|                     |                  |
|---------------------|------------------|
| ABREAZMRAB28        | GCCACGTGGG       |
| ABRETAEM            | GGACACGTGGC      |
| ABREZMRAB28         | CCACGTGG         |
| ACGTROOT1           | GCCACGTGGC       |
| CACGTGMOTIF         | CACGTG           |
| GBOXPC              | ACCACGTGGC       |
| GBOXRELOSAMY3       | CTACGTGGCCA      |
| SGBFGMGMAUX28       | TCCACGTGTC       |
| SITEIIBOSPCNA       | TGGTCCCAC        |
| ABASEED1            | TGTTACGTGCC      |
| ACGTSEED2           | ACACACGTCAA      |
| ACGTSEED3           | GTACGTGGCG       |
| AGL3ATCONSENSUS     | TTWCYAWWWWTRGWAA |
| AMMORESVDCRNIA1     | GGCCCCGGG        |
| AUXRETGA1GMGH3      | TGACGTAA         |
| BOXBPSAS1           | AAACGACACCGTTT   |
| CONSERVED11NTZMATP1 | ACGTATTAATA      |
| D4GMAUX28           | TAGTGCTGT        |
| GLUTAACAOS          | AACAACTCTAT      |
| HDZIPIIIAT          | GTAATSATTAC      |
| LS7ATPR1            | ACGTCATAGA       |
| O2F3BE2S1           | TCCACGTACT       |
| OCTAMOTIF2          | CGCGGCAT         |
| OPAQUE2ZM22Z        | TCCACGTAGA       |
| PIATGAPB            | GTGATCAC         |
| PR2GCNT             | TAARAGCCGCC      |
| RBENTGA3            | TCCAACCTGGA      |
| SORLREP3AT          | TGTATATAT        |
| SRENTTTO1           | TGGTAGGTGAGAT    |

---



**Supplemental Table 3.** List of Motifs Enriched in both phyA-associated and –regulated Promoters.

| motif               | species        | motif sequence | signal-<br>ing | motif<br>Annota-<br>tion | possible<br>TF | reported<br>target<br>gene | reference                                  |
|---------------------|----------------|----------------|----------------|--------------------------|----------------|----------------------------|--------------------------------------------|
| GBOXPC              | parsley        | ACCACGTGGC     | light          | G-box                    | GBFs           |                            | Plant Cell 6: 545-559 (1994)               |
| CPRFPCCHS           | parsley        | CCACGTGGCC     | light          | Box II                   | CPRFs          | <i>CHS</i>                 | EMBO J 10: 1777-1786 (1991)                |
| LREBOXIIPCCHS1      | parsley        | TCCACGTGGC     | light          | LRE                      |                | <i>CHS-1</i>               | EMBO J 8: 651-656 (1989)                   |
| MREATCHS            | arabidopsis    | TCTAACCTACCA   | light          | MRE                      | MYB            | <i>CHS</i>                 | Plant Mol Biol (1998) 36: 741-754          |
| PE2FNTRNR1A         | tobacco        | ATTCGCGC       | light          | pE2F                     |                | <i>RNR1a</i>               | Nucleic Acids Res. 32: 1430-1438 (2004)    |
| BOXIIPCCHS          | parsley        | ACGTGGC        | light          | LRE                      |                | <i>CHS</i>                 | EMBO J 8:651 (1989)                        |
| GBOXLERBCS          | arabidopsis    | MCACGTGGC      | light          | G-box                    |                | <i>rbcS-1A</i>             | EMBO J 9:1717 (1990)                       |
| HY5AT               | arabidopsis    | TGACACGTGGCA   | light          | G-box                    | HY5            |                            | Plant Cell 10:673 (1998)                   |
| LRENPCABE           | tobacco        | ACGTGGCA       | light          | LRE                      |                | <i>CAB-E</i>               | EMBO J 7:1929 (1988)                       |
| ABREAZMRAB28        | maize          | GCCACGTGGG     | ABA            | ABRE-A                   |                | <i>RAB28</i>               | Plant Cell 9:2261 (1997)                   |
| ABREZMRAB28         | arabidopsis    | CCACGTGG       | ABA            | ABRE                     | CBF2           | <i>Adh</i>                 | Plant Physiol.139:437 (2005)               |
| ABREATCONSENSUS     | arabidopsis    | YACGTGGC       | ABA            | ABRE                     | ABFs           |                            | Plant Physiol 138:341 (2005)               |
| EMBP1TAEM           | arabidopsis    | CACGTGGC       | ABA            | ABRE                     | ABFs           |                            | Science 250:267 (1990)                     |
| ABREA2HVA1          | barley         | CCTACGTGGC     | ABA            | ABRE                     |                | <i>HVA1</i>                | Plant Cell 8:1107-1119 (1996)              |
| ABRETAEM            | wheat          | GGACACGTGGC    | ABA            | ABRE                     | EMBP-1         |                            | Science 250:267-270 (1990)                 |
| ABRE2HVA22          | barley         | CGCACGTGTC     | ABA            | ABRE                     |                | <i>HVA22</i>               | Plant Cell 7:295-307 (1995)                |
| ABRE3HVA1           | barley         | GCAACGTGTC     | ABA            | ABRE                     |                | <i>HVA1</i>                | Plant Mol Biol 26:617-630 (1994)           |
| ABREBNNAPA          | Brassica napus | CGCCACGTGTCC   | ABA            | ABRE                     |                | <i>napA</i>                | Planta 199:515-519 (1996)                  |
| ACGTABREMOTIFA2OSEM | arabidopsis    | ACGTGKC        | ABA            | ABRE                     |                | <i>rd29A</i>               | Plant J. 34: 137-148 (2003)                |
| ABADESI1            | rice           | RTACGTGGCR     | ABA            | ABRE                     | TAF-1          | <i>rab21</i>               | PNAS 87:1406 (1990); EMBO J 10:1793 (1991) |
| ACGTROOT1           | tobacco        | GCCACGTGGC     | ABA            | ACGT motif               | TAF-1          |                            | Plant Cell 4:1485 (1992)                   |
| ABREATRD22          | arabidopsis    | RYACGTGGYR     | ABA            | ABRE                     |                | <i>RD22</i>                | Mol Gen Genet 247:391 (1995)               |
| SGBFGMGMAUX28       | soybean        | TCCACGTGTC     | auxin          | G-box                    | SGBF-1/-2      | <i>AUX28</i>               | Plant J 8:199 (1995)                       |
| AUXRETGA2GMGH3      | soybean        | TGACGTGGC      | auxin          | AUXRE                    | SGBF-2         | <i>GH3</i>                 | Plant Physiol 115:397 (1997)               |

|               |             |                |          |           |           |                    |                                           |
|---------------|-------------|----------------|----------|-----------|-----------|--------------------|-------------------------------------------|
| DR5GMGH3      | soybean     | CCTTTTGTCTC    | auxin    | AUXRE     | ARF1      | <i>GH3</i>         | Plant Cell 9:1963 (1997)                  |
| GARE2         | rice        | RTAACARANTCYGG | GA       | GARE      |           |                    | Plant Mol Biol 14:655-668 (1990)          |
| EREGCC        | arabidopsis | TAAGAGCCGCC    | ethylene | GCC-box   | AtEBP     |                    | PNAS 94: 5961-5966 (1997)                 |
| HEXAT         | arabidopsis | TGACGTGG       | defense  | Hex motif | TGA1/GBF1 |                    | TPC 4: 1309 (1992);MPMI 25:1459 (2012)    |
| CACGTGMOTIF   | arabidopsis | CACGTG         | Em       | G-box     | GBF4      | <i>β-phaseolin</i> | Plant Mol Biol 39:1299-1310 (1999)        |
| UPRE2AT       | arabidopsis | CCACGTCATC     | UPR      | UPRE      | XBP1      |                    | Biochem Biophys Res Commun 301:225 (2003) |
| UPRMOTIFIAT   | arabidopsis | CCACGTCA       | UPR      | UPRE      |           |                    | Plant Cell 15:561 (2003)                  |
| GBOXRELOSAMY3 | rice        | CTACGTGGCCA    | SS       | G-box     |           | <i>Amy3D</i>       | Plant Mol Biol 36:331 (1998)              |
| SITEIIBOSPCNA | rice        | TGGTCCCAC      | ME       | Site IIb  | PCF1/2    | <i>PCNA</i>        | Plant J 7:877 (1995)                      |

LRE: Light-responsive element; MRE: MYB responsive element; ABRE: ABA responsive element; AUXRE: auxin-responsive element; EIRE: Elicitor-responsive element; UPRE: unfolded protein responsive element.

Em: embryogenesis; UPR: unfolded protein response; SS: sugar starvation; ME: meristematic tissue-specific expression.

N=A,T,C,G; M=A,C; Y=C,T; W=A,T; R=A,G; X, unknown base.

**Supplemental Table 4.** List of Primers Used in This Study.

| <b>For ChIP-PCR verification</b> |                              |
|----------------------------------|------------------------------|
| <b>name</b>                      | <b>sequence</b>              |
| actin-F                          | CACAATGTTTGGCGGGATTGGTGA     |
| actin-R                          | TGTA CTTCCTTTCCGGTGGAGCAA    |
| NAC-a-F                          | GGTTCAATGAACTCAAGGGAT        |
| NAC-a-R                          | ACGCAGTGTATAGGTGAATCCA       |
| NAC-b-F                          | GTGGACACGTGTCGTCAT           |
| NAC-b-R                          | ATGTGAACTGGTAAAGGAAGAG       |
| AT2G23130-pro-R                  | GATCTGGACCGTTGAAGGGAC        |
| AT2G23130-pro-F                  | CGGAATATGCCAACTCTCCA         |
| AT4G38420-pro-R                  | CGAGAAATATTGATTGAACGC        |
| AT4G38420-pro-F                  | ATGAAAGTGAAGGGAAAAGGAGA      |
| AT5G07440-pro-R                  | TGTAGGGGAAAGAAGAGAAAGC       |
| AT5G07440-pro-F                  | AACTTTCCA ACTCAAGCCAATA      |
| AT5G46880-pro-R                  | TAACGCTCGTCTAACTCTTCCGT      |
| AT5G46880-pro-F                  | AACGCGTGGTGAATAAAAAGTTTG     |
| AT1G53920-pro-R                  | GAAGCAGAACTGTCCAGAAGAG       |
| AT1G53920-pro-F                  | AAAGTGATTGCCTAGAGAAGTGC      |
| AT1G10110-pro-R                  | CGATGCTTATTCAGTTATTTGGTT     |
| AT1G10110-pro-F                  | CGAGATCGCATCATTTTCCA         |
| AT1G01470-pro-R                  | AAGTCGTGAATCTTCTTCTCTTA      |
| AT1G01470-pro-F                  | GACTTCTTAACATAAATGCTGACTC    |
| AT1G09950-pro-R                  | CCGACACATGTTGGTAAAATAAG      |
| AT1G09950-pro-F                  | GAACTGTTGGTTTATTTGGTTTCTA    |
| AT1G02800-pro-R                  | TGCATATGCTTTGTCAGACCAA       |
| AT1G02800-pro-F                  | ACTGAAAGGAATAAATGAAGGTGC     |
| AT2G37678-pro-R                  | GAGAGAGAGAGATAGAGAGAGTTCAA   |
| AT2G37678-pro-F                  | ACGCGCCAAATCAAACA            |
| AT2G25690-pro-R                  | GGATCTATGGGCGGGTCAAG         |
| AT2G25690-pro-F                  | CACAAAACAGAGTGGGAACAGTG      |
| AT4G34000-pro-R                  | TTGAGAAATAAAAGATACCTGAAAGG   |
| AT4G34000-pro-F                  | GGTGGGAAACGCAAATGTAT         |
| AT5G05440-pro-R                  | TGATTGTGGTAAATTTTAAGATAGACAT |
| AT5G05440-pro-F                  | TAATATAAAAATGGGCAACAAGAACA   |
| AT5G57050-pro-R                  | CCATTATTGTCGGAAAACAGAC       |
| AT5G57050-pro-F                  | GTAATAAATAAAACAGACACCAAATAA  |
| AT1G67080-pro-R                  | AGAAATTGGATGGAGTAGGAAGA      |
| AT1G67080-pro-F                  | TTTTTGTACCATTTAATCTCAAGAAT   |

|                 |                            |
|-----------------|----------------------------|
| AT1G71960-pro-R | CTTGAGAGAGACGAGGAGATGAATC  |
| AT1G71960-pro-F | TCCTTTCAGCAGTCGCCAGC       |
| AT4G26080-pro-R | CTCTCTTTTTTCTCTCCTCATTA    |
| AT4G26080-pro-F | CCATCATCCAAAGCCCCTT        |
| AT4G27410-pro-R | CTTCGATTCCTCAGCAACCAA      |
| AT4G27410-pro-F | CAGTATCTAAATGGTTAAACGGGTC  |
| AT5G13630-pro-R | TGATATAAGAGTACCGCTTCATTCTC |
| AT5G13630-pro-F | GTTGATTTTATTAAATTAGTCTGCGT |
| AT5G52570-pro-R | TTTTCTAGGATTTTCCCAAGTCA    |
| AT5G52570-pro-F | TCATGTCAAGCAATACCTCATTTA   |
| AT5G66880-pro-R | ATATTCGGTTGCGTTATTCCGTTA   |
| AT5G66880-pro-F | CATGGTGGGATTGGGCTGG        |

**For reverse transcription-PCR verification**

| <b>name</b> | <b>sequence</b>          |
|-------------|--------------------------|
| AT2G25450-R | TCAGATCCTTAAATGGTCCAAC   |
| AT2G25450-F | GACCCATTAAAGAGCTTCTGTCT  |
| AT1G61890-R | AGCGGCTCACGGCTCTCTT      |
| AT1G61890-F | GAATATGGACTGGGATGATTGG   |
| AT5G66052-R | TTAAGACAAAGATGAAGCGGC    |
| AT5G66052-F | TCGTCCGGTATTGATGGCTTT    |
| AT5G62230-R | TTATATGCTACTTTTGGAGATGAC |
| AT5G62230-F | TCCCATCTCTGCAAGTAGCAA    |
| AT5G46880-R | CTAGCTGACTTCTTGATTGGAC   |
| AT5G46880-F | GTAACGTCCCAACAGCGAAAC    |
| AT5G07440-R | TTAAGCTTCCCAACCACGCAA    |
| AT5G07440-F | GAACTTGAGCTGCAAAAATACA   |
| AT5G02490-R | GACTTCCTCGATCTTGGGACC    |
| AT5G02490-F | TGGTGGTGAAGCTGGTGGTC     |
| AT4G31805-R | TCTAGAAAACTGGTGCGGTGTA   |
| AT4G31805-F | CCTGCTTGCCCAGCGTG        |
| AT4G04850-R | TTAATCTTGAGCTTTATCAGC    |
| AT4G04850-F | CTGCAGCAGAGATTCTTC       |
| AT3G61830-R | TCACCCCTACTACGATTTTC     |
| AT3G61830-F | GTGATGATCCGTGGAATGAGTT   |
| AT3G25030-R | TTGTGGTATTACAGAGAGGACAG  |
| AT3G25030-F | ACGGCGGCGGAGATAAG        |
| AT3G15630-R | GCAGCTGCTTAGCCTTCTCC     |
| AT3G15630-F | CATGGTGGGCTCCTCTTTTTG    |
| AT2G25690-R | ATCTATCATCATCTCCTCTGAACG |
| AT2G25690-F | ATAACTTCCTCGGCATCTGC     |
| AT2G23130-R | CGGAGCAGGCGGGCTTA        |
| AT2G23130-F | CACCTTCAGCTGATGTTCCG     |

|                 |                            |
|-----------------|----------------------------|
| AT2G19800-R     | AATACTTGTTGATGAGTGAAATGTAG |
| AT2G19800-F     | GAGCCTACACACACTTGATGAAC    |
| AT2G16365-R     | GAACCTCCTTGTGACTCTCTGGCT   |
| AT2G16365-F     | GAGGAGATGACATTACACTTCTGC   |
| AT1G10110-R     | TTATTCACCAGCACCGAAACAA     |
| AT1G10110-F     | GTGCTTATGAGATTCCTACGCA     |
| AT1G10090-R     | GGGAATTACGAATTGGGGAAG      |
| AT1G10090-F     | TGCTCAGATCAGGAGTTACCAG     |
| AT1G09950-R     | GAGGTGAAGCTGTCCGATTGT      |
| AT1G09950-F     | GGAGGCGATGGAGGTGCTTA       |
| AT1G02800-R     | TTAGGATCGAGCAAGATAAGCC     |
| AT1G02800-F     | GGTGCAGTAGTCGGTGGTCC       |
| AT1G15520-R     | GCTTCACACTCATATTAATCTGC    |
| AT1G15520-F     | CTTTCTACGGCATCTGGAATCTC    |
| AT4G27410-R     | ACGTCGTCAAGCTGTGATGAAG     |
| AT4G27410-F     | TGGATTATGCACGAGTATCGCTTA   |
| AT3G15500-R     | TCAAATAAACCCGAACCCACTA     |
| AT3G15500-F     | CTGAGTCATAACGTTCCGAGTATTC  |
| AT1G01360-R     | TCACTGAGTAATGTCCTGAGAAGC   |
| AT1G01360-F     | GGAGATAATCGAGGGAAGAGC      |
| AT2G40330-R     | GGCGAGTTTAGCCAGCGATTG      |
| AT2G40330-F     | ACGGTGCATGAGTCGGAGGA       |
| AT2G38310-R     | AACGTCAACGAAGTCACAAGTCTCT  |
| AT2G38310-F     | CTCGACGACGAACGCCAC         |
| AT2G29090-R     | ATTCGGAGGAGTGATGGATTC      |
| AT2G29090-F     | GATACAAGAAAAATGCCACTGACC   |
| AT1G52400-R     | CACAGTTTCCAACCTCCAAGC      |
| AT1G52400-F     | CAAAGTGAACGTTACGGGATACT    |
| AT5G67030-R     | TTATCGTTGTTACTCTCATTCTTCC  |
| AT5G67030-F     | ACGGAACCTATGTGACCGAT       |
| AT5G57050-R     | CTTCAAATCAACCACTACCACACTTA |
| AT5G57050-F     | TTTACTATGGCATAAGAAGAACGC   |
| AT4G26080-R     | TTCCTCCGAGGCTTCAAATCA      |
| AT4G26080-F     | ACAAGAAAAACGCGGTGGCT       |
| AT5G13630-R     | CGATCTTGTCTTCCACCTGC       |
| AT5G13630-F     | GAGGAGATGCTGAACCGTCT       |
| AT4G19230-R     | GGCAATTCTGTCATTCTACACTTC   |
| AT4G19230-F     | GATTCATCATCTCACCACCAAG     |
| AT3G14440-R     | TCACACGACCTGCTTCGC         |
| AT3G14440-F     | ATGGAAATCGGAGTTACAGATAGTTA |
| <b>For EMSA</b> |                            |
| <b>name</b>     | <b>sequence</b>            |

|               |                                                      |
|---------------|------------------------------------------------------|
| NAC-988-F-BIO | TTCTACGATAGACACGTGGACACGTGTCGTC<br>ATGATGTAGTTTTGT   |
| NAC-988-F     | TTCTACGATAGACACGTGGACACGTGTCGTC<br>ATGATGTAGTTTTGT   |
| NAC-988-R     | ACAAAACACTACATCATGACGACACGTGTCCAC<br>GTGTCTATCGTAGAA |
| NAC-159-F-BIO | TCACGACGATCTAACTGACACACGTGTCAGA<br>ATTCAAAGTG        |
| NAC-159-F     | TCACGACGATCTAACTGACACACGTGTCAGA<br>ATTCAAAGTG        |
| NAC-159-R     | CACTTTTGAATTCTGACACGTGTGTCAGTTA<br>GATCGTCGTGA       |

---

**For yeast assays and tobacco assay**

---

| <b>name</b> | <b>sequence</b>                           |
|-------------|-------------------------------------------|
| NACpA-F     | ATTGGTACCACGTGGACACGTGTC (tobacco also)   |
| NACpA-R     | actgtcgacGAAATATGTGAACTGGTAA              |
| NACpB-F     | agggtaccTTACCAGTTCACATATTC                |
| NACpB-R     | actgtcgacACATGAGTAGATTTAGCTC              |
| NACpC-F     | attggtaccGAGCTAAATCTACTCATGT              |
| NACpC-R     | actgtcgacTTGACAATAATGTTTGG (tobacco also) |
| NACp-mG1-F  | CGATCTAACTGACAAAAAATCAGAATTC              |
| NACp-mG1-R  | GAATTCTGATTTTTTTTGTGAGTTAGATCG            |
| NACp-mACE-F | CCATATTCAGTACACAAAATAATCAGCG              |
| NACp-mACE-R | CGCTGATTATTTTGTGTAATGAAATATGG             |
| NACp-mG2-F  | ATTGGTACCACGTGGAAAAAATCGTCATGA            |
| NACp-mG3-F  | GTCAACAAAAAATAAATAAATATC                  |
| NACp-mG3-R  | GATATTTATTTTTTTTTTTTTTTTGTGAC             |

---
